# Supplementary material for: Synthesis of string-bean-like anisotropic titania nanoparticles with basic amino acids
Source: Royal Society of Chemistry journal article supplement (doi:10.1039/c3ra47170e), 2014-01-01
Supplement: c3ra47170e.pdf [file c3ra47170e.pdf]

# Electronic Supplementary Information

## **Synthesis of String-Bean-like Anisotropic Titania Nanoparticles with Basic Amino Acids**

*Junzheng Wang,<sup>†, ‡</sup> John K. Katahara,<sup>†, ‡</sup> Akihito Kumamoto,<sup>§</sup> Tetsuya Tohei,<sup>§</sup> Ayae Sugawara-  
Narutaki,<sup>†</sup> Atsushi Shimojima,<sup>†, ¶</sup> and Tatsuya Okubo<sup>\*†</sup>*

<sup>†</sup>Department of Chemical System Engineering, The University of Tokyo, 7-3-1 Hongo, Bunkyo-ku,  
Tokyo 113-8656, Japan

<sup>§</sup>Institute of Engineering Innovation, The University of Tokyo, 2-11-16 Yayoi, Bunkyo-ku, Tokyo 113-  
8656, Japan

\*Corresponding Author: okubo@chemsys.t.u-tokyo.ac.jp.

### **Present Address**

<sup>‡</sup>International Center for Materials Nanoarchitectonics (MANA), National Institute for Materials Science  
(NIMS), Tsukuba, Ibaraki 305-0044, Japan.

<sup>‡</sup>Department of Chemical Engineering, University of Washington, Seattle, Washington 98195, United  
States.

<sup>¶</sup>Department of Applied Chemistry, Waseda University, 3-4-1 Ohkubo, Shinjuku-ku, Tokyo 169-8555,  
Japan.

## Experimental Section

**Materials.** Titanium isopropoxide, titanium tetraethoxide, titanium tetrabutoxide, sodium hydroxide (50 wt% NaOH in water), nitric acid, triethanolamine, arginine, and lysine were purchased from Wako Pure Chemical Industries Ltd. All chemicals were used as received without any further purification. Milli-Q water (18.2 M $\Omega$ ) was used for all experiments.

**Characterization.** SEM images were taken on a Hitachi S-900 instrument with an accelerating voltage of 6 kV. Samples were prepared by spin-coating of the colloidal nanoparticles onto silicon wafers. Before observation, a layer of Pt was deposited on the SEM samples by sputtering with a Hitachi E-1030 instrument for 10s. TEM images were obtained with a JEOL JEM-2800 transmission electron microscope at an accelerating voltage of 200 kV. Nitrogen adsorption and desorption isotherms were obtained at 77 K using Autosorb-iQ (Quantachrome Instruments). Before measurements, samples were degassed at 300 °C for 8 h. The Brunauer–Emmett–Teller (BET) specific surface areas of samples were calculated from adsorption data at a relative pressure range of 0.05–0.2. The total pore volumes were evaluated from the adsorbed amount of nitrogen at a relative pressure of 0.99. The pore size distributions were obtained with the adsorption branches of the isotherms by the Barrett–Joyner–Halenda (BJH) method.

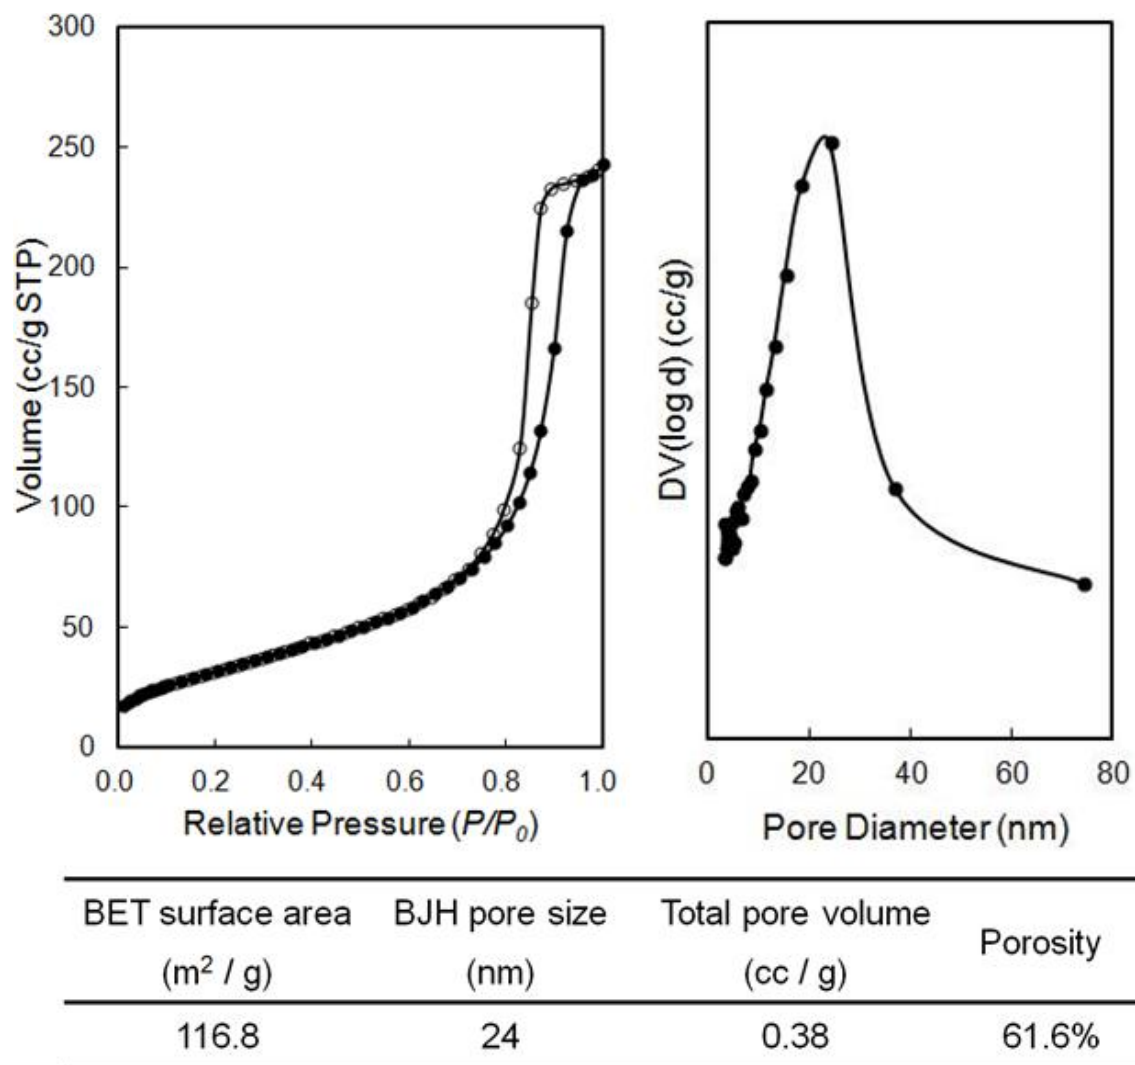

**Fig. S1**

Pore characteristics of string-bean-like anisotropic  $TiO_2$  nanoparticles.

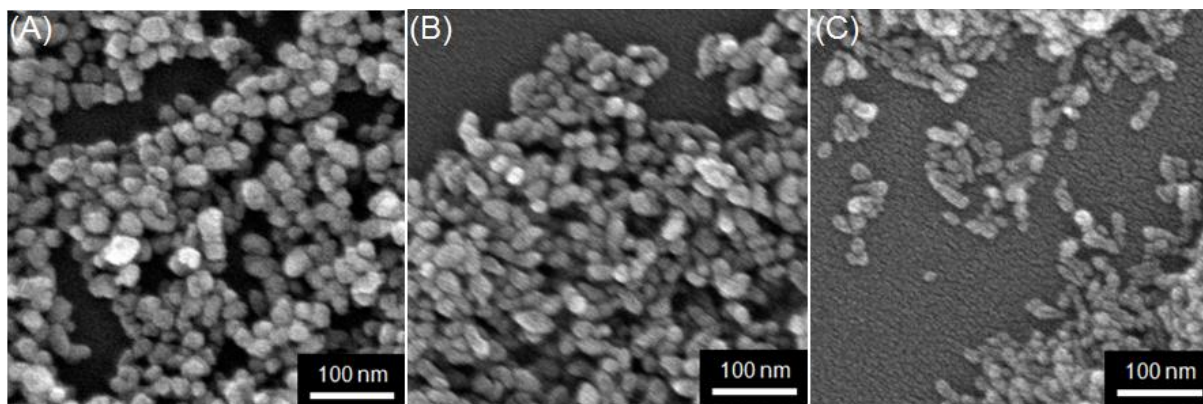

**Fig. S2**

SEM images of TiO<sub>2</sub> nanoparticles synthesized at 150 °C and varied concentrations of arginine: (A) 0, (B) 1, and (C) 5 wt%.

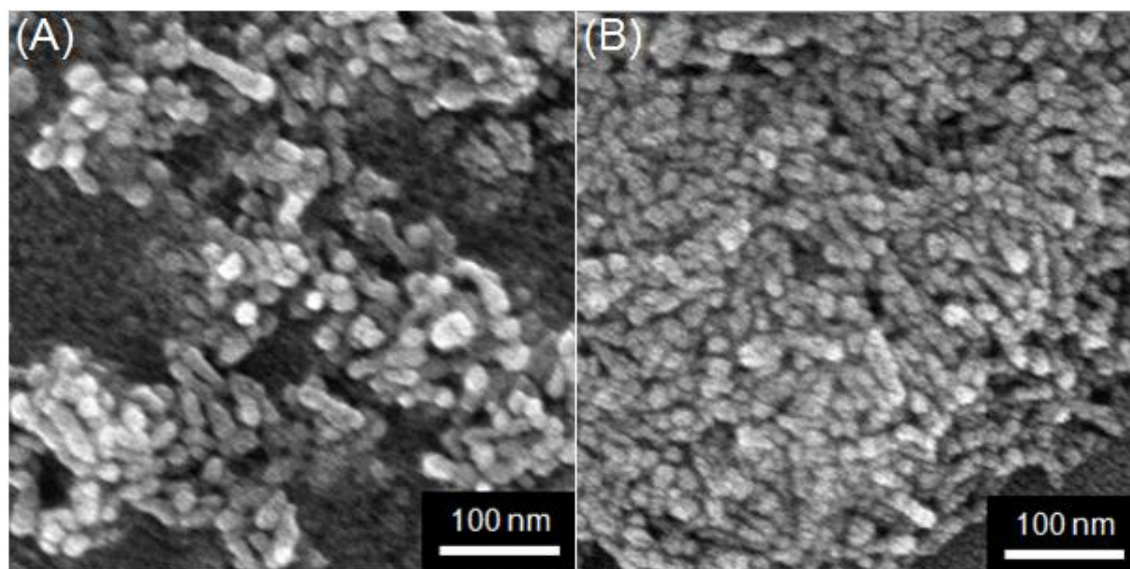

***Fig. S3***

SEM images of unpeptized string-bean-like TiO<sub>2</sub> nanoparticles synthesized at 150 °C with 10 wt% of arginine and different precursors: (A) titanium tetraethoxide and (B) titanium tetrabutoxide.

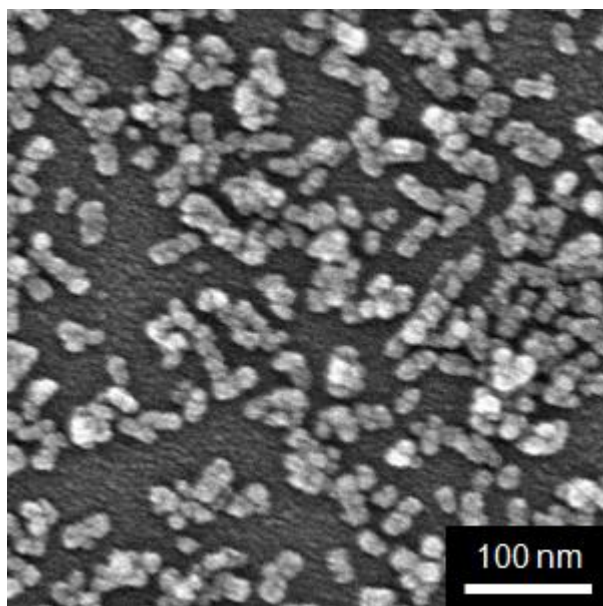

***Fig. S4***

SEM images of string-bean-like TiO<sub>2</sub> nanoparticles synthesized at 150 °C with lysine.

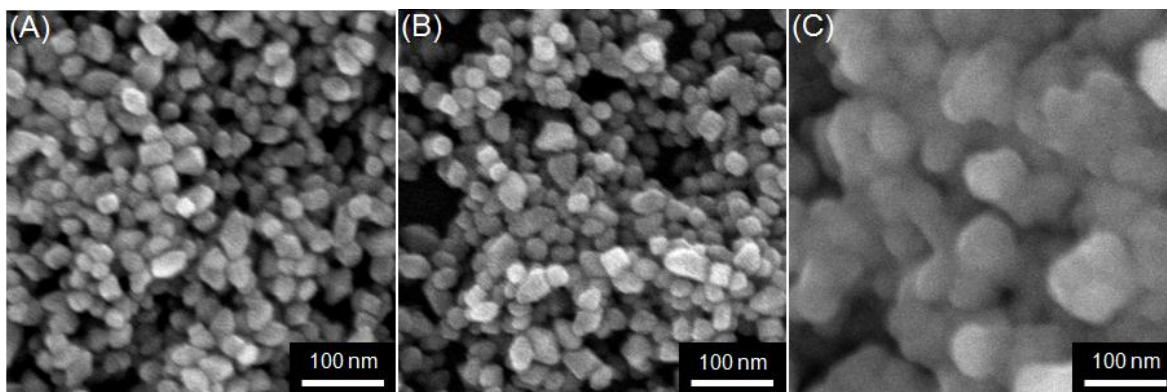

**Fig. S5**

SEM images of TiO<sub>2</sub> nanoparticles synthesized at 190 °C and varied concentrations of arginine: (A) 1, (B) 5, and (C) 10 wt%.

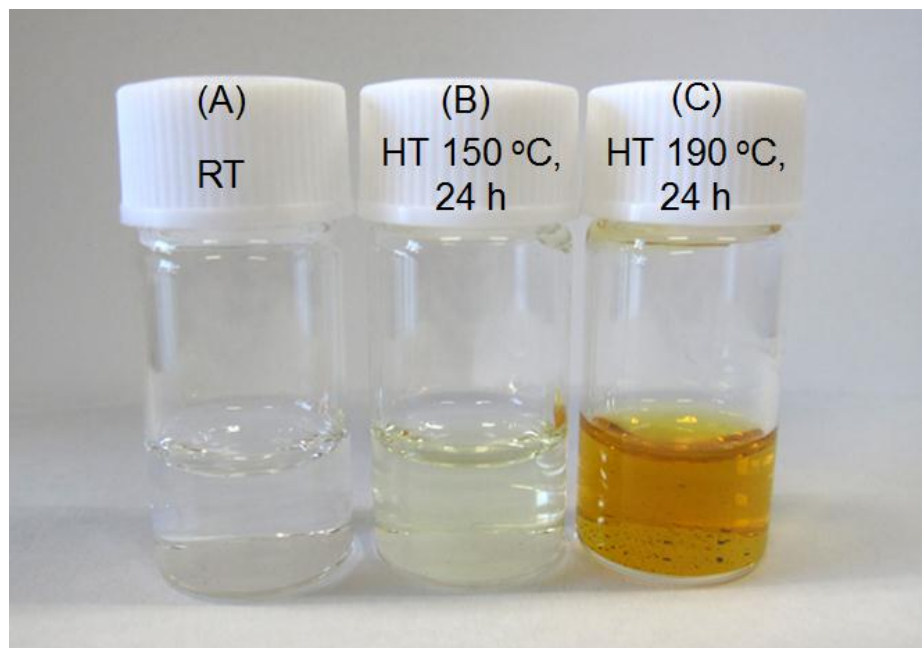

**Fig. S6**

Photographs of aqueous arginine solutions (10 wt%) after treatment at different temperature for 24 h :

(A) room temperature, (B) 150 °C, and (C) 190 °C.
